# Supplementary material for: In vivo and in silico studies on the mechanisms of egg white peptides in relieving acute colitis symptoms
Source: Royal Society of Chemistry journal article supplement (doi:10.1039/d1fo03095g), 2021-01-01

### Supplement Figures

**Fig.S1** Sequences and structures of peptides identified from egg white

**Fig.S2** HPLC chromatograms of a mixed standard solution of 20 amino acids (**a**) and free amino acids contents in egg white peptides (n=3). The letters “a-i” means significant differences between experimental groups,  $p < 0.05$ .

**Fig.S3** Changeable of the reference ligands structures before and after re-docking

**Fig.S4** The Kyoto Encyclopedia of Genes and Genomes (KEGG) pathway suggested that the core targets were participated in the PI3K-AKT pathway and VEGF pathway. The red targets represent the selected core targets according to the analysis.

**Fig.S5** Position of peptides in the hydrophobic depression domain of core targets crystal structure

Fig.S1

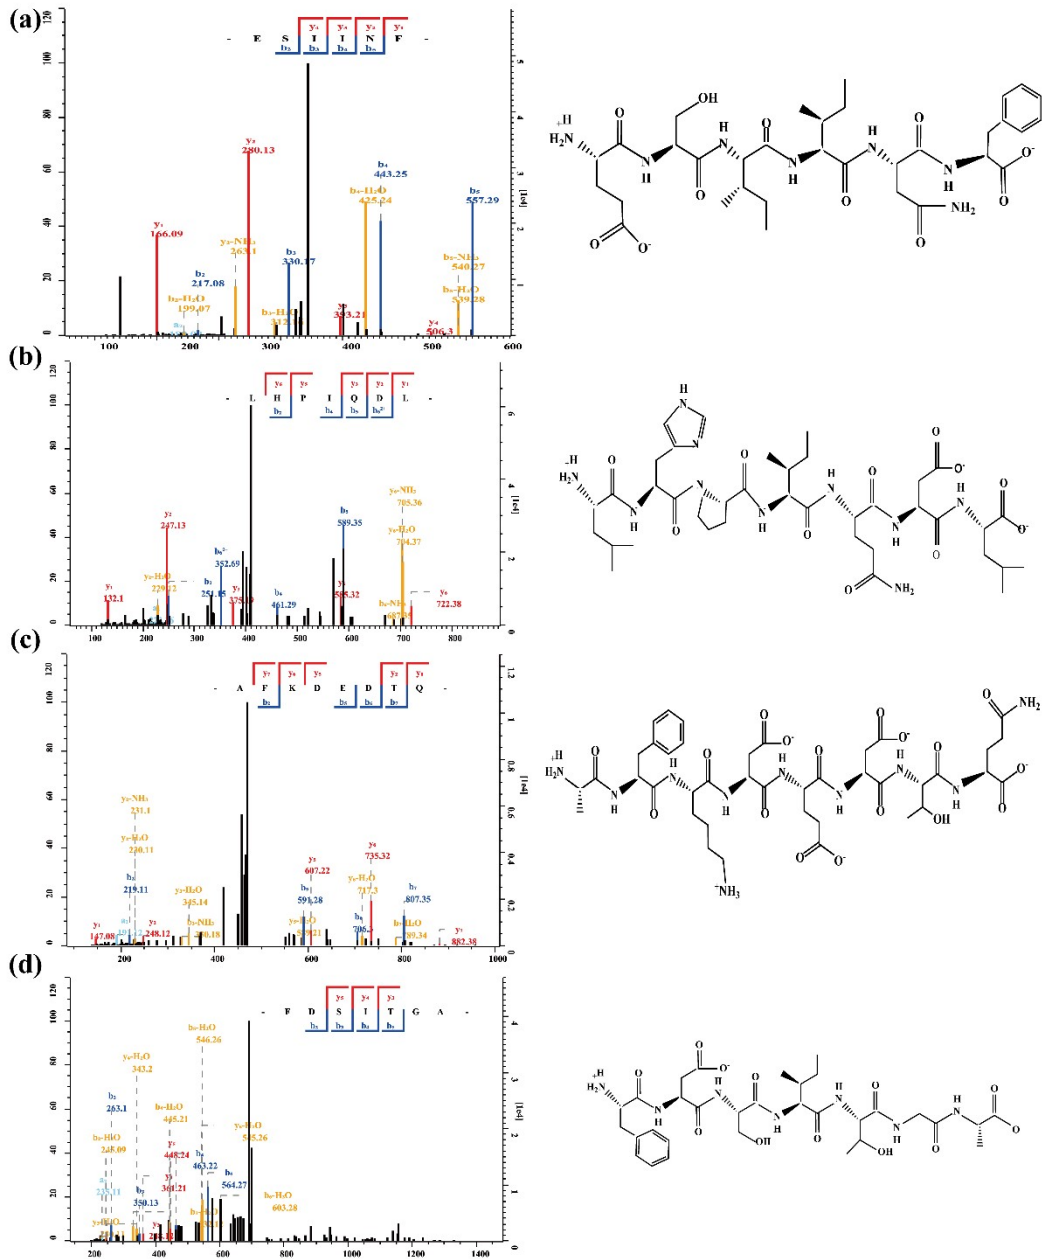

**Fig.S2**

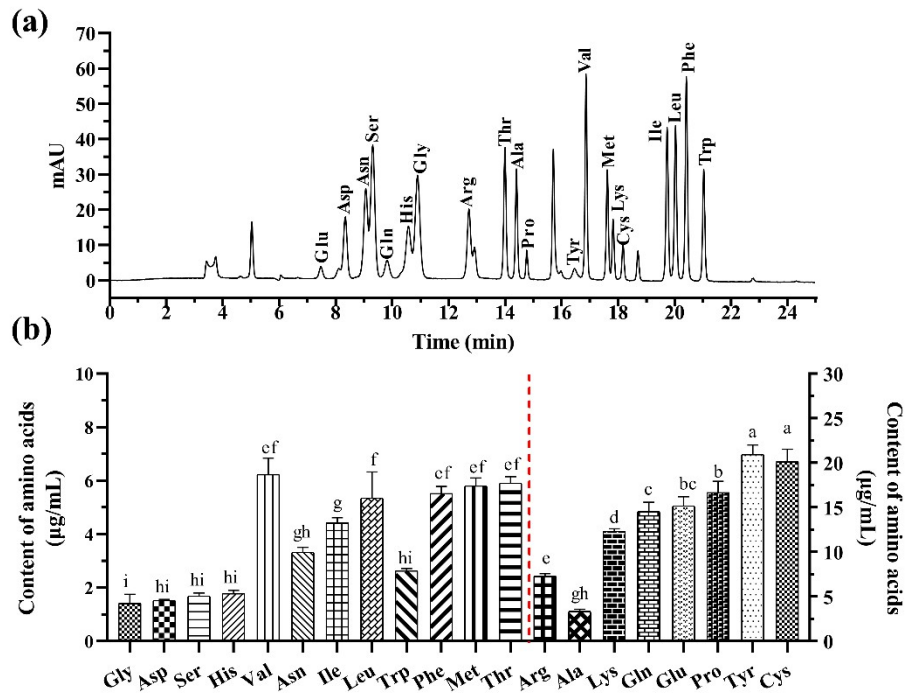

**Fig.S3**

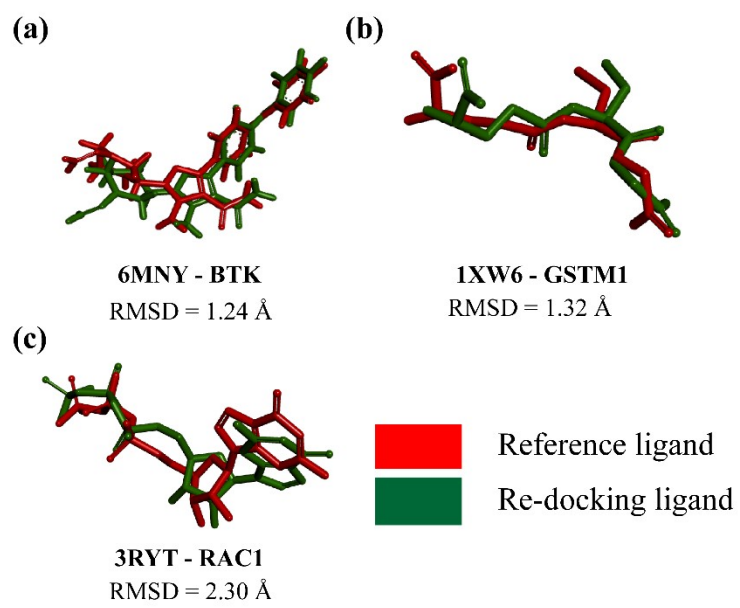

Fig.S4

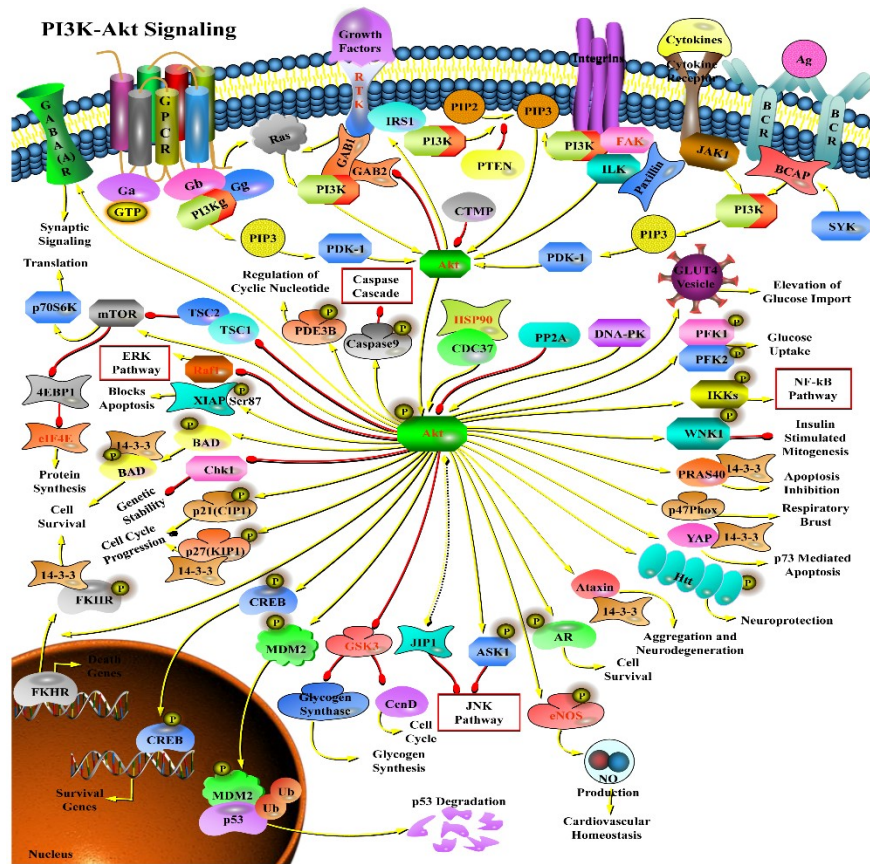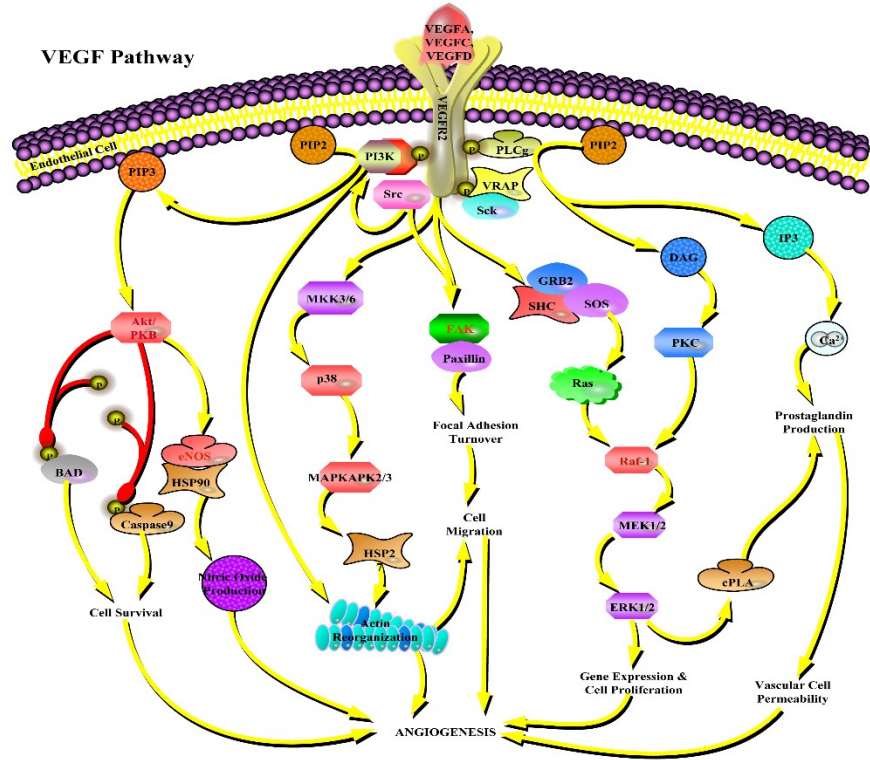

**Fig.S5**

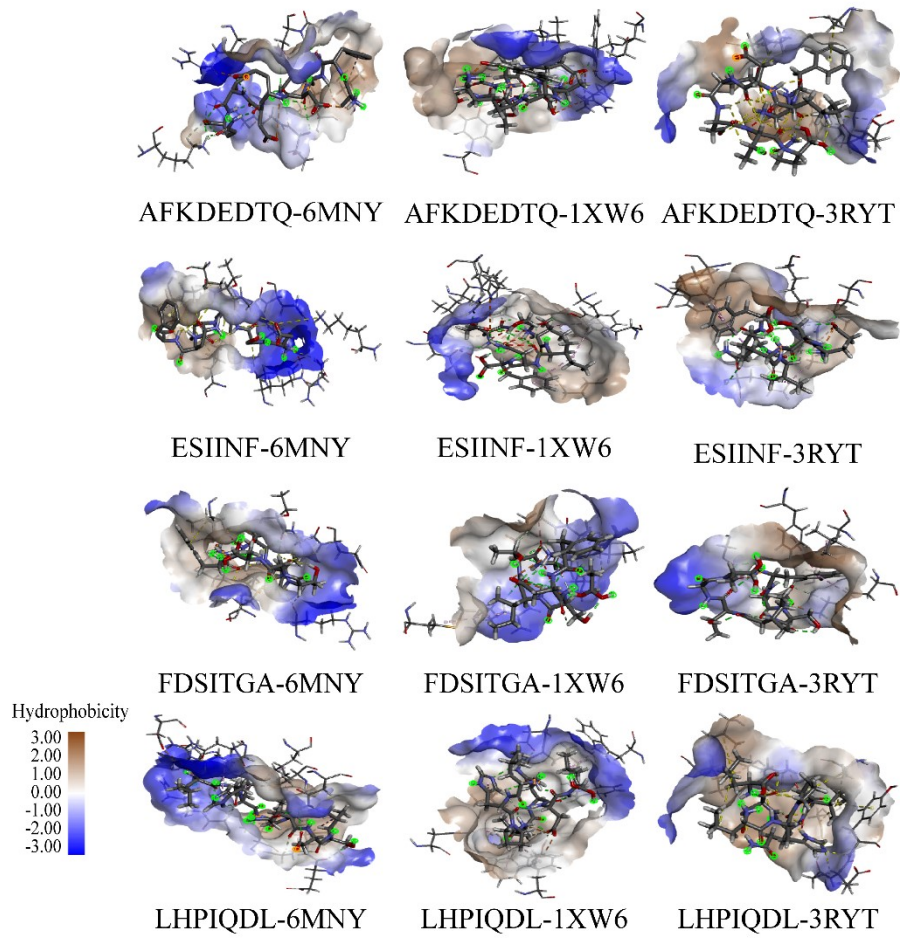

Supplement: d1fo03095g1.pdf [file d1fo03095g1.pdf]
