# Supplementary material for: In vivo and in silico studies on the mechanisms of egg white peptides in relieving acute colitis symptoms
Source: Royal Society of Chemistry journal article supplement (doi:10.1039/d1fo03095g), 2021-01-01
Supplement: d1fo03095g2.pdf [file d1fo03095g2.pdf]

### **Supplement Tables**

**Tab.S1** Core targets prediction of peptides intervention in acute colitis

**Tab.S2** KEGG (Kyoto Encyclopedia of Genes and Genomes) signaling pathways of the predicted core targets (organism: *Mus musculus*) ( $p < 0.05$ )

**Tab.S3** Results of molecular docking between core targets and peptides

**Tab.S1**

| Rank | Gene symbol | Protein name                                        | UniProt ID |
|------|-------------|-----------------------------------------------------|------------|
| 1    | Acat        | Acetyl-CoA acetyltransferase, mitochondrial         | Q8QZT1     |
| 2    | Akr1b1      | Aldose reductase                                    | P45376     |
| 3    | Akt1        | RAC-alpha serine/threonine-protein kinase           | P31750     |
| 4    | Akt2        | RAC-beta serine/threonine-protein kinase            | Q60823     |
| 5    | Alb         | Serum albumin                                       | Q546G4     |
| 6    | Ang         | Angiogenin                                          | P21570     |
| 7    | Arf1        | ADP-ribosylation factor 1                           | P84078     |
| 8    | Btk         | Tyrosine-protein kinase BTK                         | P35991     |
| 9    | Casp1       | Caspase-1                                           | P29452     |
| 10   | Casp3       | Caspase-3                                           | P70677     |
| 11   | Cat         | Catalase                                            | Q91XI2     |
| 12   | Clic1       | Chloride intracellular channel protein 1            | Q9Z1Q5     |
| 13   | Cma1        | Chymase                                             | A4QPC5     |
| 14   | Dhfr        | Dihydrofolate reductase                             | P00375     |
| 15   | Dpp4        | Dipeptidyl peptidase 4                              | P28843     |
| 16   | Eea1        | Early endosome antigen 1                            | Q8BL66     |
| 17   | Egfr        | Epidermal growth factor receptor                    | Q01279     |
| 18   | Eif4e       | Eukaryotic translation initiation factor 4E         | P63073     |
| 19   | F2          | Prothrombin                                         | Q3TJ94     |
| 20   | Fabp5       | Fatty acid-binding protein, epidermal               | Q05816     |
| 21   | G6pd        | Glucose-6-phosphate 1-dehydrogenase                 | Q43727     |
| 22   | Gsk3b       | Glycogen synthase kinase-3 beta                     | Q5KU03     |
| 23   | Gss         | Glutathione synthetase                              | P51855     |
| 24   | Gsta1       | Glutathione S-transferase A1                        | P13745     |
| 25   | Gstm1       | Glutathione S-transferase Mu 1                      | P10649     |
| 26   | Hadh        | Hydroxyacyl-coenzyme A dehydrogenase, mitochondrial | Q61425     |
| 27   | Hsp90aa1    | Heat shock protein HSP 90-alpha                     | P07901     |
| 28   | Insr        | Insulin receptor                                    | P15208     |
| 29   | Lck         | Proto-oncogene tyrosine-protein kinase LCK          | P06240     |
| 30   | Lcn2        | Neutrophil gelatinase-associated lipocalin          | P11672     |
| 31   | Mapk10      | Mitogen-activated protein kinase 10                 | Q61831     |
| 32   | Mif         | Macrophage migration inhibitory factor              | P34884     |
| 33   | Mme         | Neprilysin                                          | Q61391     |
| 34   | Mmp12       | Macrophage metalloelastase                          | Q61391     |
| 35   | Mmp2        | 72 kDa type IV collagenase                          | P33434     |
| 36   | Mmp3        | Stromelysin-1                                       | P28862     |
| 37   | Nos3        | Nitric oxide synthase, endothelial                  | P70313     |
| 38   | Nr1h2       | Oxysterols receptor LXR-beta                        | Q60644     |
| 39   | Nr1i2       | Nuclear receptor subfamily 1 group I member 2       | O54915     |
| 40   | Plau        | Urokinase-type plasminogen activator                | P06869     |
| 41   | Plg         | Plasminogen                                         | P20918     |
| 42   | Pnpo        | Pyridoxine-5-phosphate oxidase                      | Q91XF0     |
| 43   | Ptk2        | Focal adhesion kinase 1                             | P34152     |
| 44   | Ptpn1       | Tyrosine-protein phosphatase non-receptor type 1    | P35821     |
| 45   | Rab11a      | Ras-related protein Rab-11A                         | E9PZB2     |
| 46   | Rab5a       | Ras-related protein Rab-5A                          | Q9CQD1     |
| 47   | Rac1        | Ras-related C3 botulinum toxin substrate 1          | Q3TLP8     |
| 48   | Raf1        | RAF proto-oncogene serine/threonine-protein kinase  | F6TUC4     |
| 49   | Sele        | E-selectin                                          | Q00690     |
| 50   | Sult1a1     | Sulfotransferase 1A1                                | P52840     |
| 51   | Sult2a1     | Sulfotransferase 2A1                                | P52843     |
| 52   | Tgfb2       | Transforming growth factor beta-2                   | P27090     |

**Tab.S2**

| Rank | Term ID  | Term description                          | Gene count | FDR         | Matching proteins                                                               |
|------|----------|-------------------------------------------|------------|-------------|---------------------------------------------------------------------------------|
| 1    | mmu05210 | Colorectal cancer                         | 8          | 5.08E-06    | Mapk10, Gsk3b, Tgfb2, Akt2, Casp3, Akt1, Rac1, Raf1                             |
| 2    | mmu05205 | Proteoglycans in cancer                   | 10         | 4.63E-05    | Tgfb2, Plau, Akt2, Mmp2, Casp3, Akt1, Rac1, Raf1, Egfr, Ptk2                    |
| 3    | mmu05212 | Pancreatic cancer                         | 7          | 4.63E-05    | Mapk10, Tgfb2, Akt2, Akt1, Rac1, Raf1, Egfr                                     |
| 4    | mmu04931 | Insulin resistance                        | 8          | 5.38E-05    | Mapk10, Gsk3b, Ptpn1, Nos3, Insr, Akt2, Nr1h2, Akt1                             |
| 5    | mmu05200 | Pathways in cancer                        | 12         | 1.15E-04    | Mapk10, Gsk3b, Tgfb2, Hsp90aa1, Akt2, Mmp2, Casp3, Akt1, Rac1, Raf1, Egfr, Ptk2 |
| 6    | mmu04012 | ErbB signaling pathway                    | 7          | 1.15E-04    | Mapk10, Gsk3b, Akt2, Akt1, Raf1, Egfr, Ptk2                                     |
| 7    | mmu04068 | FoxO signaling pathway                    | 8          | 1.15E-04    | Mapk10, Tgfb2, Insr, Akt2, Cat, Akt1, Raf1, Egfr                                |
| 8    | mmu04910 | Insulin signaling pathway                 | 8          | 1.34E-04    | Mapk10, Gsk3b, Ptpn1, Insr, Akt2, Akt1, Raf1, Eif4e                             |
| 9    | mmu04915 | Estrogen signaling pathway                | 7          | 1.72E-04    | Hsp90aa1, Nos3, Akt2, Mmp2, Akt1, Raf1, Egfr                                    |
| 10   | mmu04151 | PI3K-Akt signaling pathway                | 11         | 1.72E-04    | Gsk3b, Hsp90aa1, Nos3, Insr, Akt2, Akt1, Rac1, Raf1, Eif4e, Egfr, Ptk2          |
| 11   | mmu04370 | VEGF signaling pathway                    | 6          | 1.72E-04    | Nos3, Akt2, Akt1, Rac1, Raf1, Ptk2                                              |
| 12   | mmu04664 | Fc epsilon RI signaling pathway           | 6          | 2.91E-04    | Mapk10, Akt2, Btk, Akt1, Rac1, Raf1                                             |
| 13   | mmu04662 | B cell receptor signaling pathway         | 6          | 3.09E-04    | Gsk3b, Akt2, Btk, Akt1, Rac1, Raf1                                              |
| 14   | mmu05152 | Tuberculosis                              | 8          | 3.38E-04    | Eea1, Mapk10, Tgfb2, Akt2, Casp3, Akt1, Raf1, Rab5a                             |
| 15   | mmu04380 | Osteoclast differentiation                | 7          | 4.29E-04    | Mapk10, Tgfb2, Lck, Akt2, Btk, Akt1, Rac1                                       |
| 16   | mmu05215 | Prostate cancer                           | 6          | 7.55E-04    | Gsk3b, Hsp90aa1, Akt2, Akt1, Raf1, Egfr                                         |
| 17   | mmu04510 | Focal adhesion                            | 8          | 7.77E-04    | Mapk10, Gsk3b, Akt2, Akt1, Rac1, Raf1, Egfr, Ptk2                               |
| 18   | mmu05014 | Amyotrophic lateral sclerosis (ALS)       | 5          | 9.82E-04    | Casp3, Cat, Casp1, Rac1, Rab5a                                                  |
| 19   | mmu05213 | Endometrial cancer                        | 5          | 0.001003258 | Gsk3b, Akt2, Akt1, Raf1, Egfr                                                   |
| 20   | mmu04932 | Non-alcoholic fatty liver disease (NAFLD) | 7          | 0.001073187 | Mapk10, Gsk3b, Insr, Akt2, Casp3, Akt1, Rac1                                    |
| 21   | mmu05231 | Choline metabolism in cancer              | 6          | 0.001073187 | Mapk10, Akt2, Akt1, Rac1, Raf1, Egfr                                            |
| 22   | mmu04066 | HIF-1 signaling pathway                   | 6          | 0.001073187 | Nos3, Insr, Akt2, Akt1, Eif4e, Egfr                                             |
| 23   | mmu04014 | Ras signaling pathway                     | 8          | 0.001073187 | Mapk10, Insr, Akt2, Akt1, Rac1, Raf1, Rab5a, Egfr                               |
| 24   | mmu04668 | TNF signaling pathway                     | 6          | 0.001375863 | Mapk10, Akt2, Casp3, Mmp3, Akt1, Sele                                           |
| 25   | mmu05164 | Influenza A                               | 7          | 0.001377226 | Mapk10, Gsk3b, Akt2, Casp1, Akt1, Plg, Raf1                                     |
| 26   | mmu04010 | MAPK signaling pathway                    | 8          | 0.001660417 | Mapk10, Tgfb2, Akt2, Casp3, Akt1, Rac1, Raf1, Egfr                              |

| Rank | Term ID  | Term description                          | Gene count | FDR         | Matching proteins                      |
|------|----------|-------------------------------------------|------------|-------------|----------------------------------------|
| 27   | mmu05211 | Renal cell carcinoma                      | 5          | 0.001983279 | Tgfb2, Akt2, Akt1, Rac1, Raf1          |
| 28   | mmu04722 | Neurotrophin signaling pathway            | 6          | 0.001983279 | Mapk10, Gsk3b, Akt2, Akt1, Rac1, Raf1  |
| 29   | mmu04071 | Sphingolipid signaling pathway            | 6          | 0.002062824 | Mapk10, Nos3, Akt2, Akt1, Rac1, Raf1   |
| 30   | mmu04917 | Prolactin signaling pathway               | 5          | 0.002346233 | Mapk10, Gsk3b, Akt2, Akt1, Raf1        |
| 31   | mmu05160 | Hepatitis C                               | 6          | 0.002936129 | Mapk10, Gsk3b, Akt2, Akt1, Raf1, Egfr  |
| 32   | mmu05161 | Hepatitis B                               | 6          | 0.003912034 | Mapk10, Tgfb2, Akt2, Casp3, Akt1, Raf1 |
| 33   | mmu04914 | Progesterone-mediated oocyte maturation   | 5          | 0.004121783 | Mapk10, Hsp90aa1, Akt2, Akt1, Raf1     |
| 34   | mmu04660 | T cell receptor signaling pathway         | 5          | 0.006934534 | Gsk3b, Lck, Akt2, Akt1, Raf1           |
| 35   | mmu05145 | Toxoplasmosis                             | 5          | 0.007760522 | Mapk10, Tgfb2, Akt2, Casp3, Akt1       |
| 36   | mmu05223 | Non-small cell lung cancer                | 4          | 0.010302019 | Akt2, Akt1, Raf1, Egfr                 |
| 37   | mmu04062 | Chemokine signaling pathway               | 6          | 0.012224552 | Gsk3b, Akt2, Akt1, Rac1, Raf1, Ptk2    |
| 38   | mmu05230 | Central carbon metabolism in cancer       | 4          | 0.014221754 | Akt2, Akt1, Raf1, Egfr                 |
| 39   | mmu05214 | Glioma                                    | 4          | 0.014471488 | Akt2, Akt1, Raf1, Egfr                 |
| 40   | mmu04015 | Rap1 signaling pathway                    | 6          | 0.016365292 | Insr, Akt2, Akt1, Rac1, Raf1, Egfr     |
| 41   | mmu05218 | Melanoma                                  | 4          | 0.017442493 | Akt2, Akt1, Raf1, Egfr                 |
| 42   | mmu05220 | Chronic myeloid leukemia                  | 4          | 0.017442493 | Tgfb2, Akt2, Akt1, Raf1                |
| 43   | mmu04520 | Adherens junction                         | 4          | 0.017442493 | Ptpn1, Insr, Rac1, Egfr                |
| 44   | mmu04666 | Fc gamma R-mediated phagocytosis          | 4          | 0.026000943 | Akt2, Akt1, Rac1, Raf1                 |
| 45   | mmu04022 | cGMP-PKG signaling pathway                | 5          | 0.028204425 | Nos3, Insr, Akt2, Akt1, Raf1           |
| 46   | mmu04912 | GnRH signaling pathway                    | 4          | 0.028204425 | Mapk10, Mmp2, Raf1, Egfr               |
| 47   | mmu05204 | Chemical carcinogenesis                   | 4          | 0.031106979 | Sult1a1, Gstm1, Gsta1, Sult2a1         |
| 48   | mmu04620 | Toll-like receptor signaling pathway      | 4          | 0.039044863 | Mapk10, Akt2, Akt1, Rac1               |
| 49   | mmu05142 | Chagas disease (American trypanosomiasis) | 4          | 0.040278532 | Mapk10, Tgfb2, Akt2, Akt1              |
| 50   | mmu04650 | Natural killer cell mediated cytotoxicity | 4          | 0.041520682 | Lck, Casp3, Rac1, Raf1                 |
| 51   | mmu05219 | Bladder cancer                            | 3          | 0.043197962 | Mmp2, Raf1, Egfr                       |
| 52   | mmu04024 | cAMP signaling pathway                    | 5          | 0.045944969 | Mapk10, Akt2, Akt1, Rac1, Raf1         |
| 53   | mmu04919 | Thyroid hormone signaling pathway         | 4          | 0.048540352 | Gsk3b, Akt2, Akt1, Raf1                |

**Tab.S3**

| Peptides-target | Hydrogen Bonds                                                                                                                                                                                                                                                                                                                                                                                                   | Electrostatic                                                      | Hydrophobic                                                                                                     |
|-----------------|------------------------------------------------------------------------------------------------------------------------------------------------------------------------------------------------------------------------------------------------------------------------------------------------------------------------------------------------------------------------------------------------------------------|--------------------------------------------------------------------|-----------------------------------------------------------------------------------------------------------------|
| AFKDEDQTQ-Gstm1 | GLU5:HN - LEU59:O<br>GLN8:HT - TYR115:OH<br>ARG42:HH21 - GLU5:OE1<br>TRP45:HE1 - GLU5:OE2<br>TRP7:HD1 - GLU5:O<br>ILE3:HN2 - ILE4:O<br>GLU1:HN1 - ASN58:OD1<br>TYR6:HH - GLU1:O                                                                                                                                                                                                                                  | LYS49:HZ3 - GLU5:OE2<br>ARG42:NE - GLU5:OE2<br>ARG42:NE - ASP6:OD2 | -                                                                                                               |
| ESIINF-Gstm1    | ARG42:HH21 - GLU1:OE1<br>TYR115:HH - SER2:O<br>GLU1:HA - LEU59:O<br>TRP7:HD1 - GLU1:O<br>PHE1:HN1 - ASN58:OD1<br>ALA7:HN - PRO57:O<br>ARG42:HE - ILE4:O<br>ARG42:HH21 - ILE4:O                                                                                                                                                                                                                                   | GLU1:HN2 - GLU1:OE2<br>ILE3:N - GLU1:OE2<br>ARG42:NE - GLU1:OE2    | ILE3 - LEU12<br>PHE6 - MET108<br>TYR115 - ILE3<br>TYR115 - ILE4<br>PHE208 - ILE3                                |
| FDSITGA-Gstm1   | LYS49:HZ1 - ALA7:O1<br>LEU59:HN - THR5:O<br>THR5:HB - LEU59:O<br>GLY6:HA2 - ASN58:OD1<br>ALA7:HA - PRO57:O                                                                                                                                                                                                                                                                                                       | -                                                                  | ILE4 - MET211                                                                                                   |
| LHPIQDL-Gstm1   | GLN5:HE21 - ASN58:OD1<br>GLN5:HE21 - LEU59:O<br>TRP7:HE1 - GLN5:O<br>TYR115:HH - ASP6:OD1                                                                                                                                                                                                                                                                                                                        | ASP6:OD2 - TYR115                                                  | ILE4 - LEU12<br>LEU7 - LEU59<br>HIS2 - LEU12<br>TRP45 - LEU7<br>HIS107 - ILE4<br>TYR115 - PRO3<br>PHE208 - ILE4 |
| AFKDEDQTQ-Rac1  | LYS3:HZ2 - GLY30:O<br>LYS3:HZ3 - ALA1:O<br>LYS3:HZ3 - GLY30:O<br>LYS116:HE1 - GLU5:OE2                                                                                                                                                                                                                                                                                                                           | LYS3:NZ - GLU31:OE2<br>LYS116:NZ - GLU5:OE2                        | ALA1 - LEU160<br>PHE2 - ALA13<br>PHE28 - ALA1                                                                   |
| ESIINF-Rac1     | ILE4:HN - GLU1:O<br>GLU1:HN3 - ALA13:O<br>TYR32:HN - ASN5:OD1<br>SER83:HG - GLU1:OE1<br>LYS116:HZ2 - PHE6:OCT<br>LYS116:HZ2 - GLU1:OE1<br>LYS116:HZ2 - GLU1:O<br>ILE4:HA - GLU1:O<br>ALA13:HA - ILE4:O<br>VAL14:HA - GLU1:OE2<br>SER83:HB1 - GLU1:OE2<br>ILE4:HN - PHE1:O<br>PHE1:HN1 - GLY30:O<br>PHE1:HN2 - GLY30:O<br>THR5:HG1 - ILE4:O<br>ALA7:HN - GLY30:O<br>GLY15:HA1 - ASP2:OD1<br>LYS116:HE1 - ASP2:OD1 | LYS116:HZ3 - GLU1:OE2                                              | PHE6 - PHE28<br>ALA13 - ILE4<br>PHE6 - LEU160<br>TYR32 - ILE4                                                   |
| FDSITGA-Rac1    |                                                                                                                                                                                                                                                                                                                                                                                                                  | LYS116:HZ1 - ASP2:OD2,                                             | PHE1 - PHE28<br>PHE1 - YS116<br>PHE1 - LEU160                                                                   |

| Peptides-target     | Hydrogen Bonds         | Electrostatic         | Hydrophobic     |
|---------------------|------------------------|-----------------------|-----------------|
| LHPIQDL -<br>Rac1   | TYR32:HN - HIS2:NE2    |                       | LEU1 - LEU7     |
|                     | LYS116:HZ2 - ASP6:O    |                       | ALA13 - ILE4    |
|                     | HIS2:HE1 - GLY30:O     |                       | ALA13 - PRO3    |
|                     | LEU7:HC - ASP6:O       | -                     | CYS18 - ILE4    |
|                     | GLU31:HA - HIS2:NE2    |                       | VAL85 - LEU7    |
|                     | LYS116:HE1 - ASP6:O    |                       | TYR32 - ILE4    |
|                     | LYS3:HZ1 - CYS481:SG   |                       |                 |
|                     | LYS3:HZ2 - THR410:O    |                       |                 |
|                     | LYS3:HN - LEU408:O     |                       |                 |
|                     | GLN8:OCT - GLN412:OE1  |                       |                 |
| AFKDEDQ -<br>Btk    | THR410:HN - LYS3:O     |                       | LYS3 - VAL416   |
|                     | GLN412:HN - ASP6:O     |                       | CYS481 - LYS3   |
|                     | CYS481:HN - PHE2:O     | ARG525:NE -GLU5:OE1   | PHE2 - LEU408   |
|                     | LYS558:HZ1 - GLN8:OCT  |                       |                 |
|                     | LYS558:HZ1 - GLN8:OE1  |                       |                 |
|                     | GLY411:HA1 - ASP6:O    |                       |                 |
|                     | GLY480:HA2 -:PHE2:O    |                       |                 |
|                     | LYS558:HE1 - GLN8:OCT  |                       |                 |
|                     | LYS558:HE2 - GLN8:OE1  |                       |                 |
|                     | ASN5:HN - LEU408:O     |                       |                 |
| ESIINF - Btk        | ASN5:HD22 - THR410:O   |                       | GLY409:N - PHE6 |
|                     | PHE6:HN - LEU408:O     |                       | ILE3 - LEU528   |
|                     | PHE6:OCT - LEU408:O    |                       | ILE4 - LEU408   |
|                     | GLU1:HN1 - ASN526:OD1  | GLU1:N - GLU1:OE2     | ILE4 - LEU528   |
|                     | THR410:HN - ASN5:OD1   | GLU1:N - ASP539:OD2   | VAL416 - ILE3   |
|                     | GLN412:HN - SER2:O     | LYS558:NZ - GLU1:OE2  | VAL416 - ILE4   |
|                     | SER2:CA - ARG525:O     |                       |                 |
|                     | GLY409:HA2 - ASN5:OD1  |                       |                 |
|                     | GLY411:HA1 - GLU1:OE2  |                       |                 |
|                     | PHE1:HN2 - LEU408:O    |                       |                 |
| FDSITG - Btk        | THR5:HN - ARG525:O     |                       | ILE4 - LEU528   |
|                     | GLY6:HN - CYS481:SG    |                       | CYS481 - ILE4   |
|                     | ALA7:HN - THR410:O     |                       | PHE1 - LEU408   |
|                     | GLN412:HN - ILE4:O     |                       |                 |
|                     | MET477:HN - ASP2:OD1   | -                     |                 |
|                     | CYS481:HN - PHE1:O     |                       |                 |
|                     | SER3:HB2 - LEU408:O    |                       |                 |
|                     | THR5:HA - ARG525:O     |                       |                 |
|                     | GLY6:HA2 - THR410:O    |                       |                 |
|                     | GLY411:HA2 - ILE4:O    |                       |                 |
| LHPIQDL - Btk       | LEU1:HN1 - ASN526:OD1  |                       | ILE4 - LEU408   |
|                     | LEU7:HT - GLU407:O     |                       | ILE4 - LEU528   |
|                     | GLN412:HN - LEU1:O     |                       | PRO3 - LEU528   |
|                     | ASN484:HD22 - GLN5:OE1 |                       | LEU7 - LEU408   |
|                     | ASN484:HD22 - ASP6:OD1 | LEU1:HN1 - ASP539:OD2 | VAL416 - ILE4   |
|                     | PRO3:HD1 - ARG525:O    | LEU1:N - ASP521:OD2   | CYS481 - PRO3   |
|                     | HIS2:HA - ARG525:O     |                       | HIS2 - ARG525   |
|                     | LEU1:HA - ASN526:OD1   |                       |                 |
|                     | GLY409:HA2 - GLN5:O    |                       |                 |
|                     | GLY409:HA2 - ASP6:O    |                       |                 |
| GLY411:HA1 - HIS2:O |                        |                       |                 |
| GLY411:HA2 - HIS2:O |                        |                       |                 |
